# Supplementary material
Source: PubMed Central journal article supplement (PMC3565457)

Relative Abundance

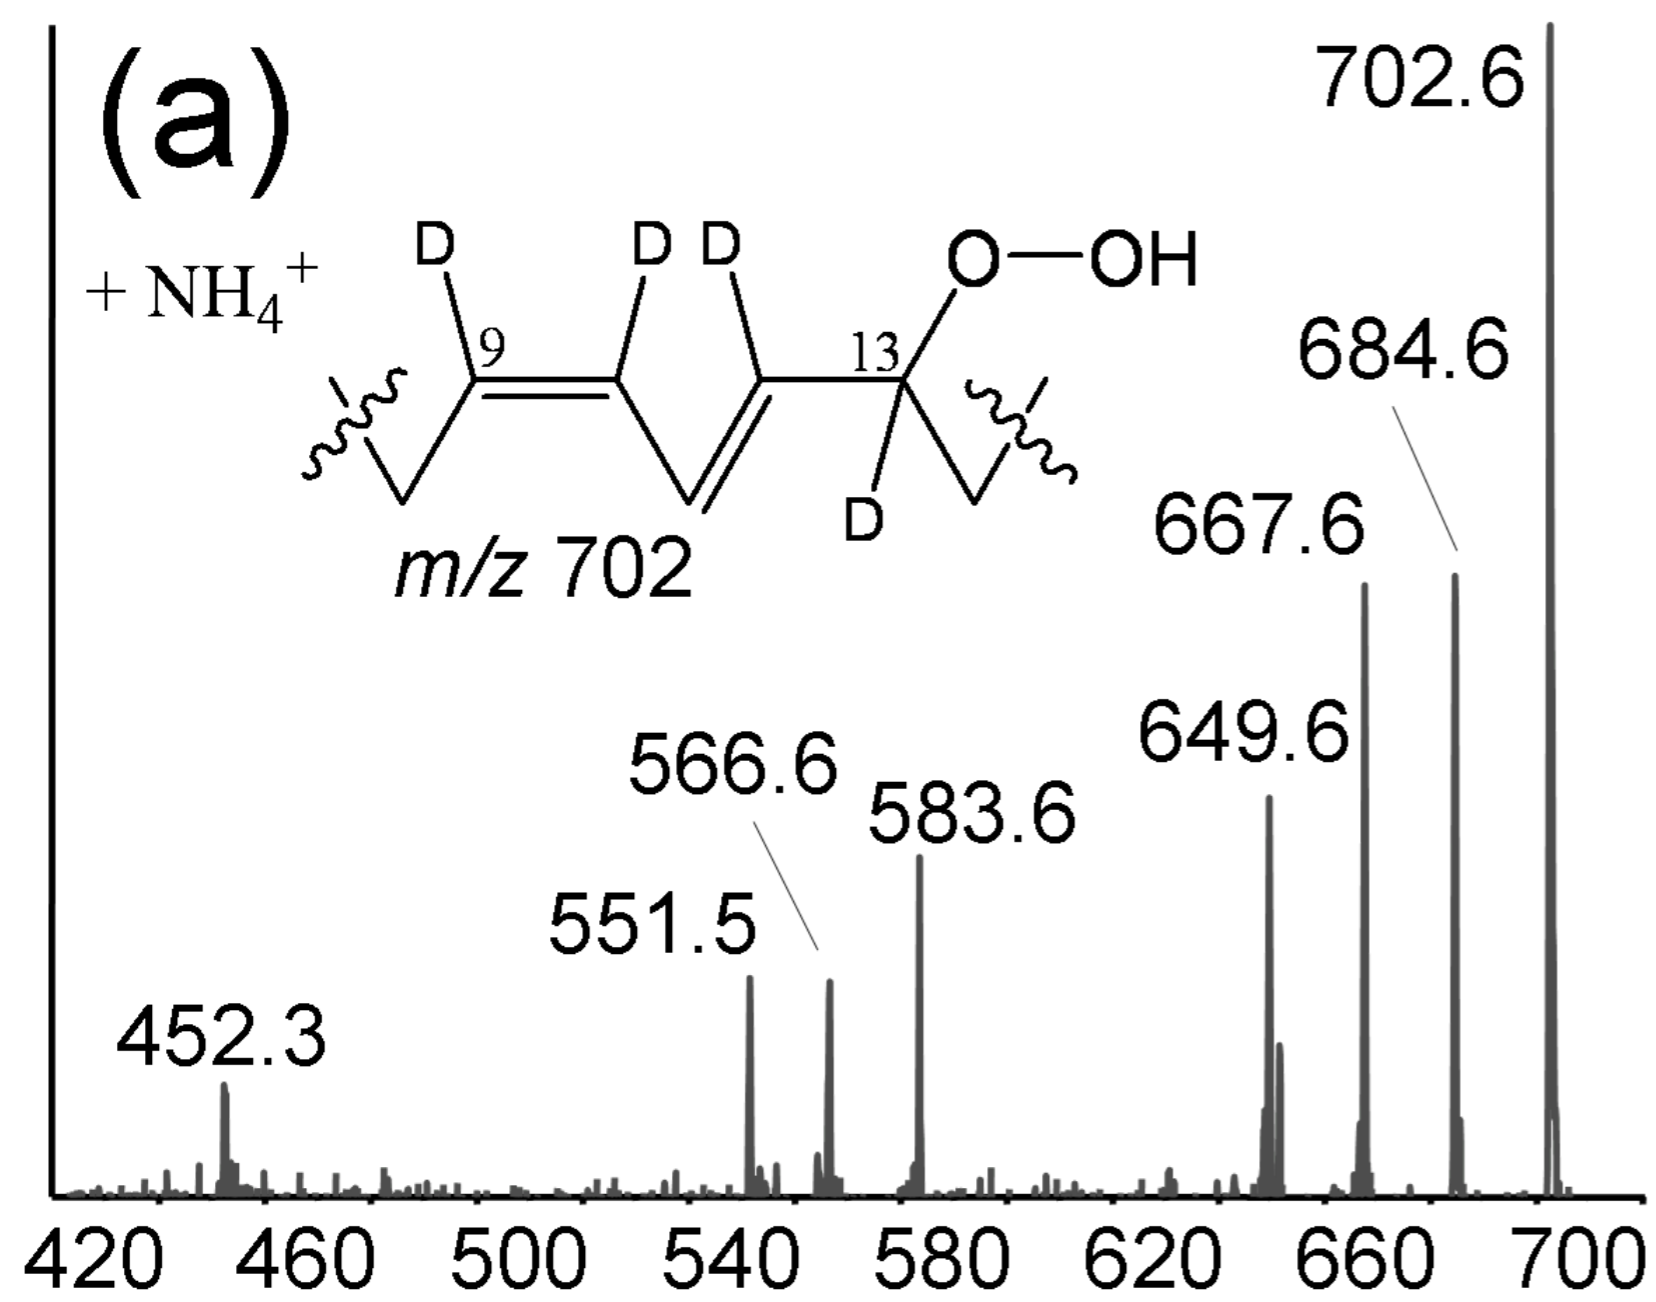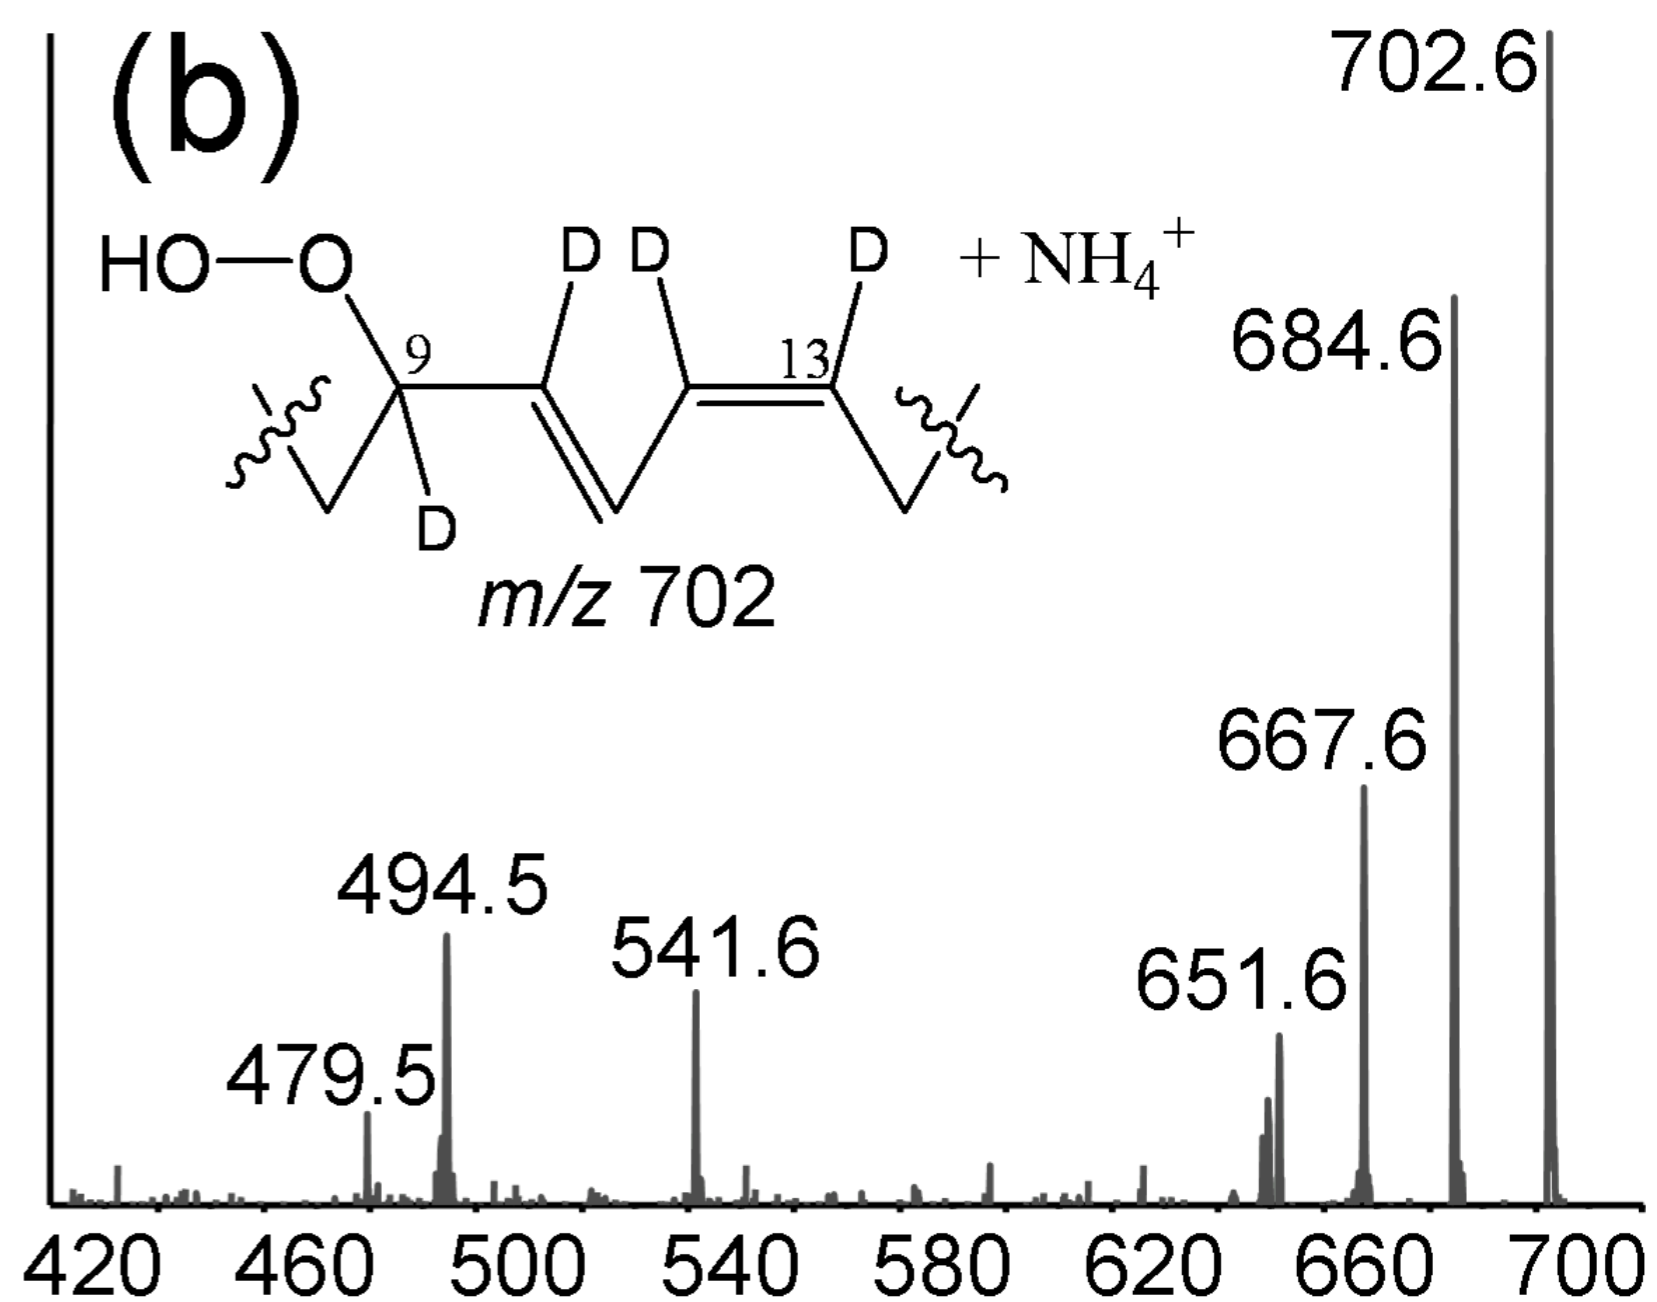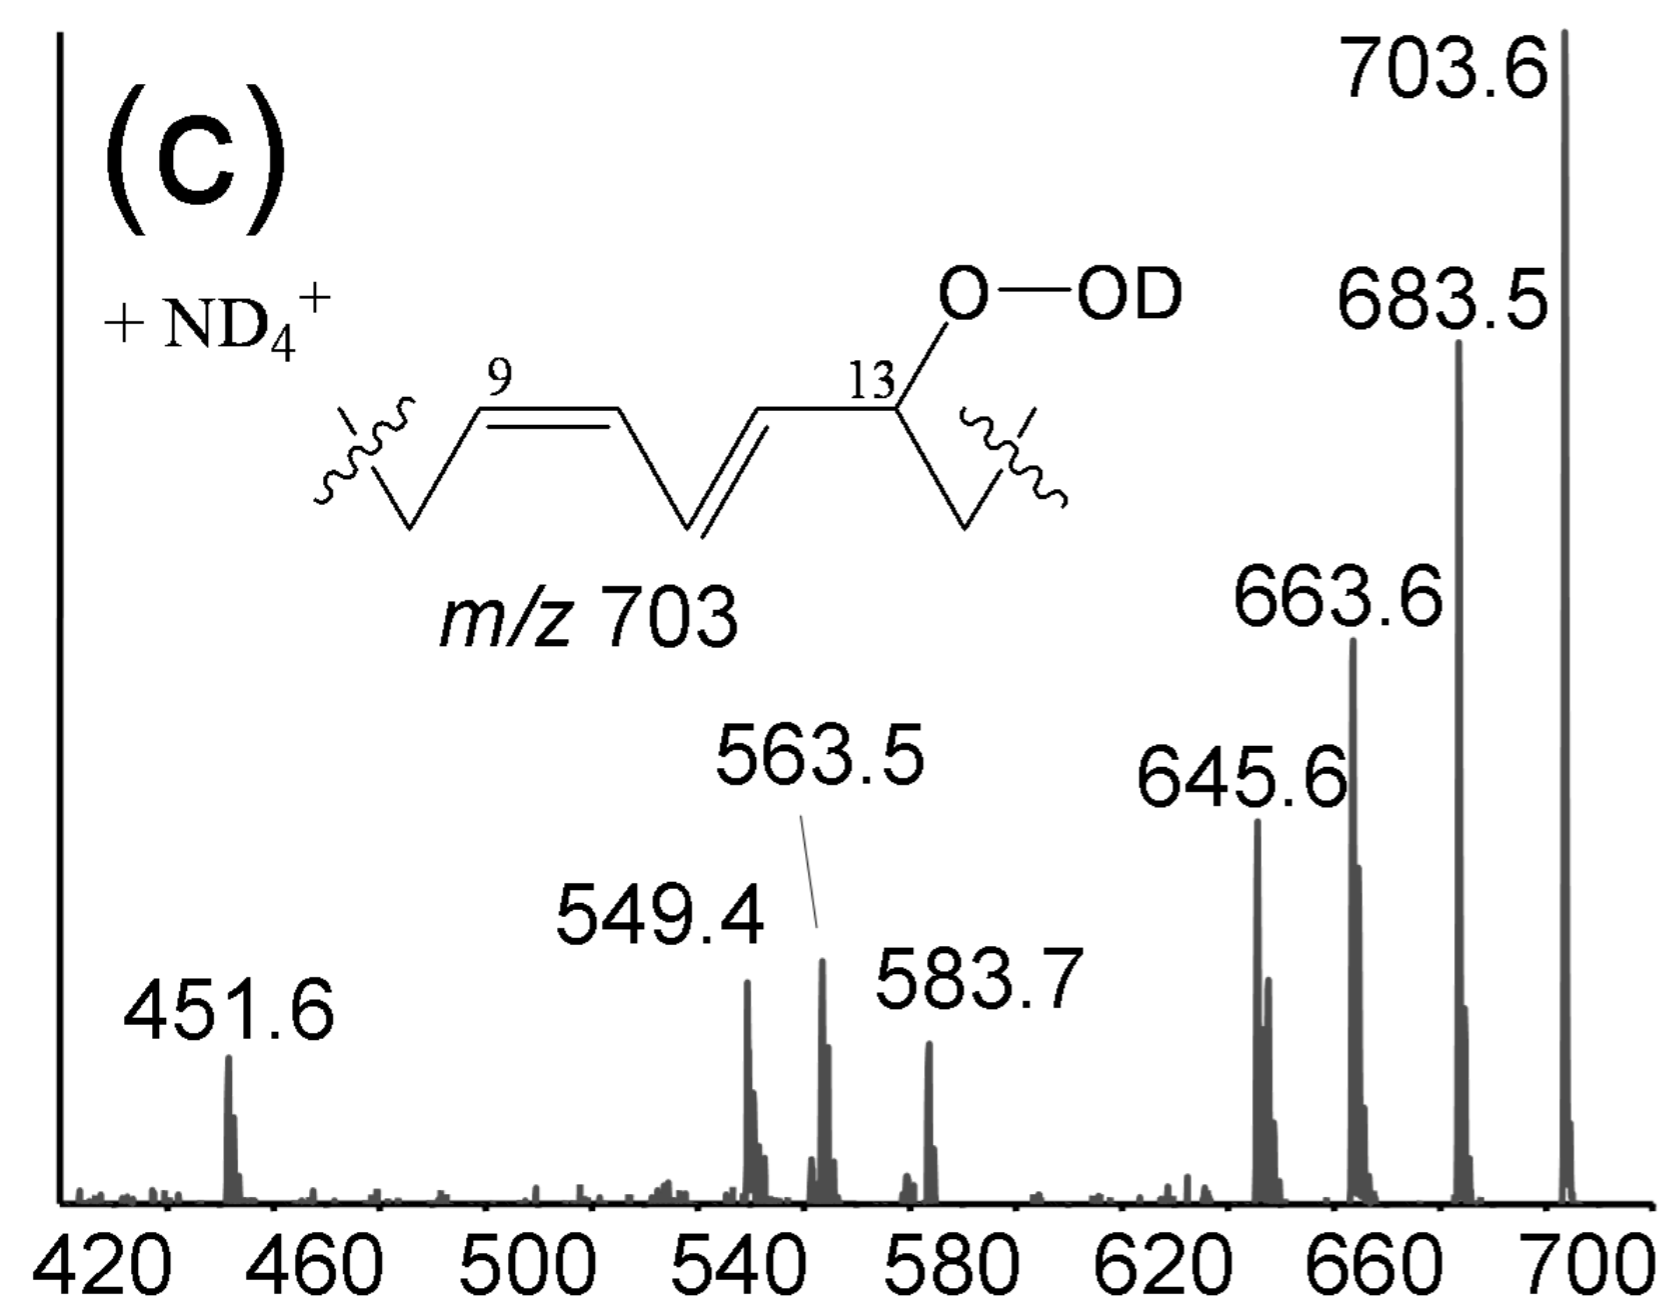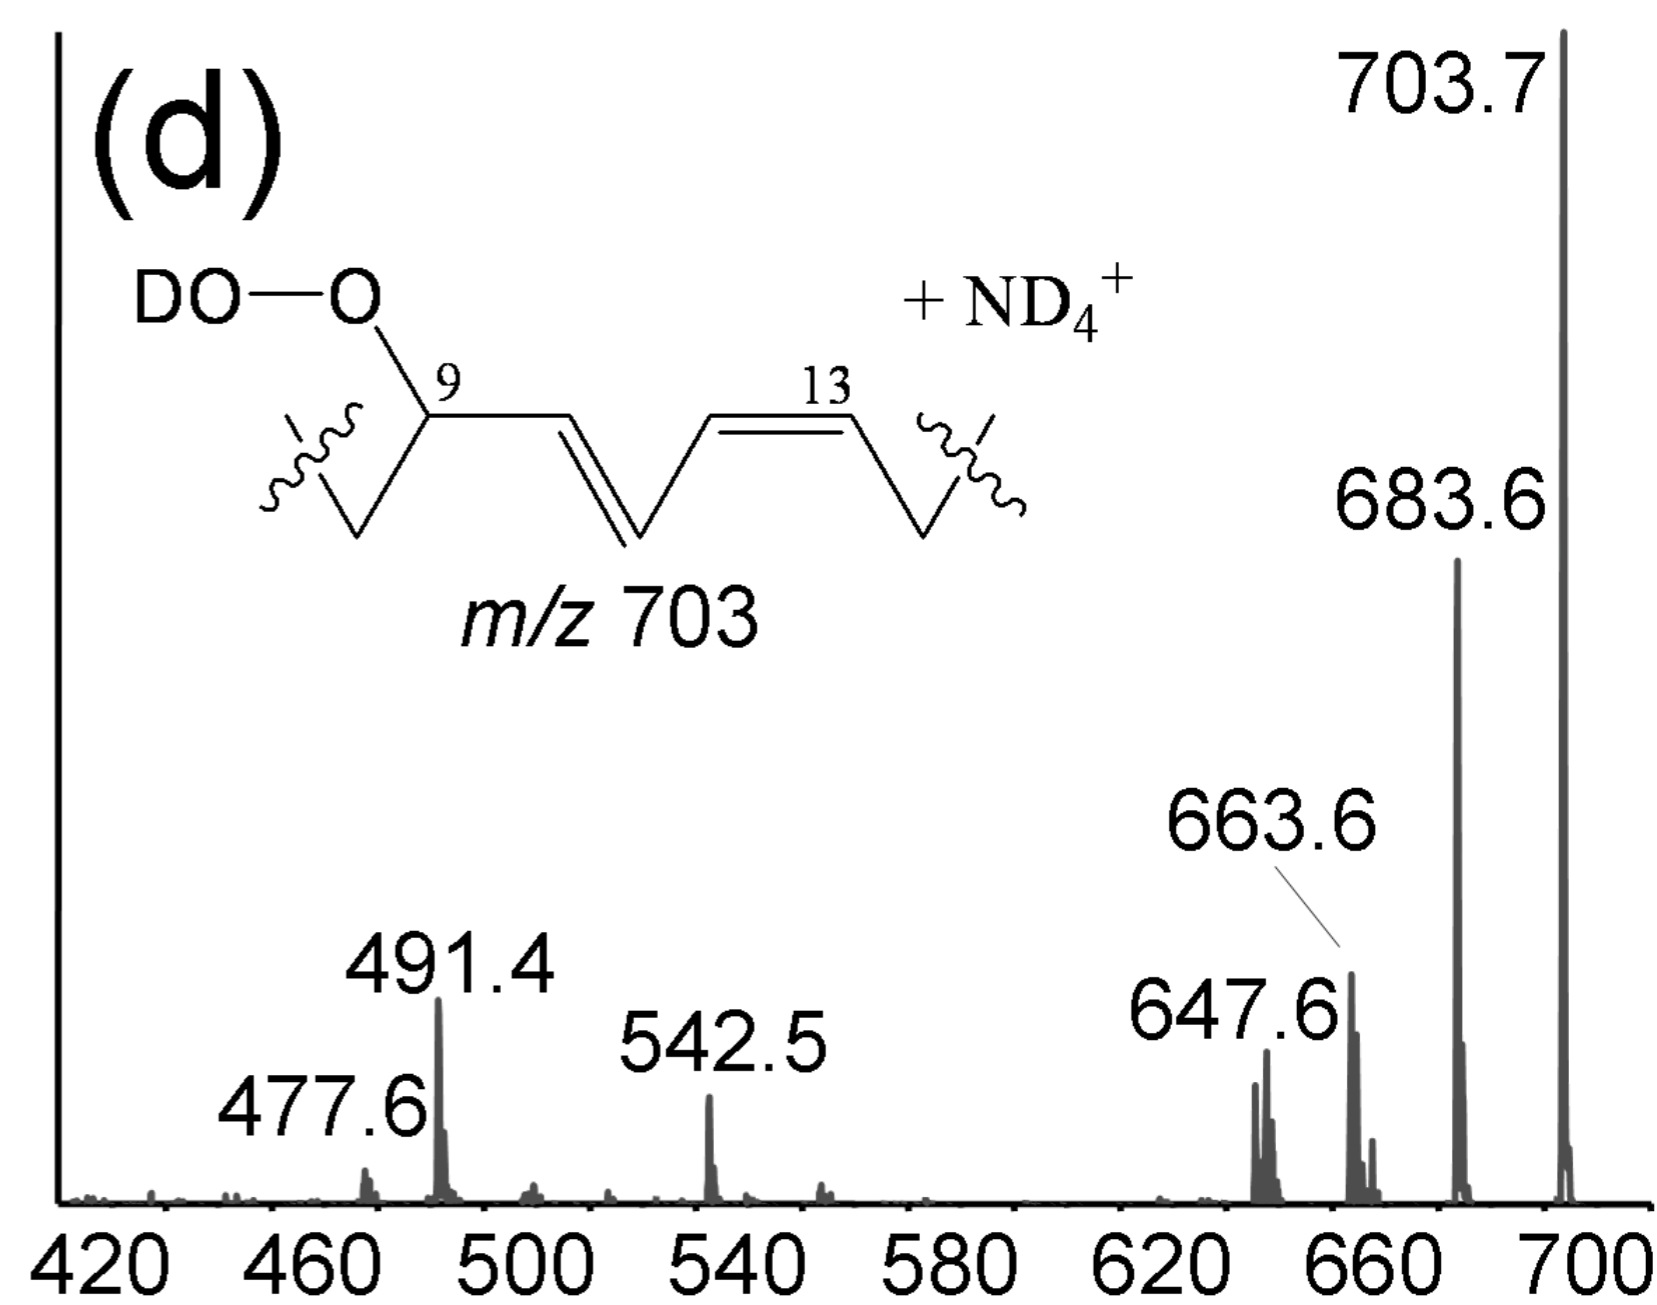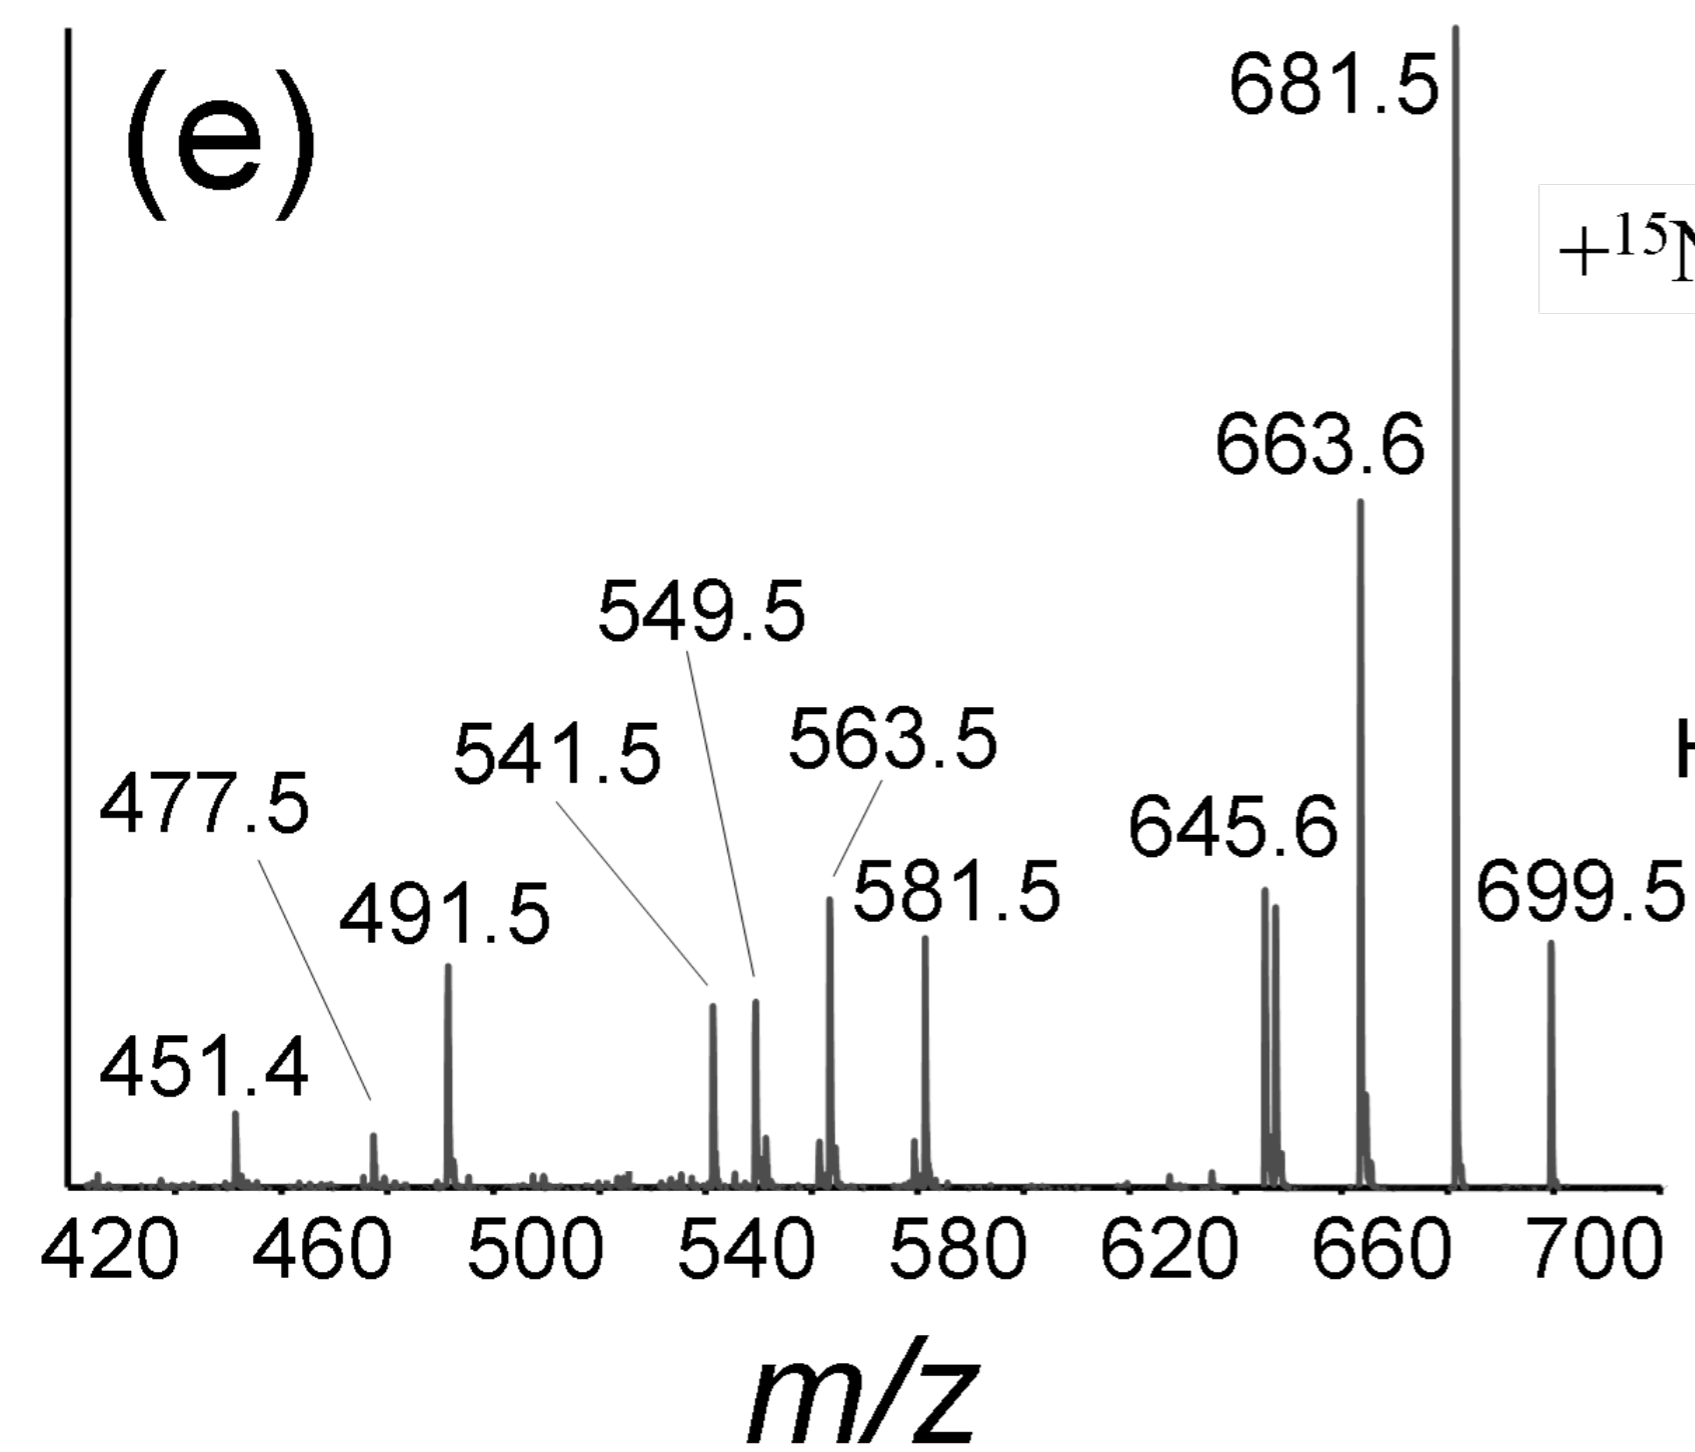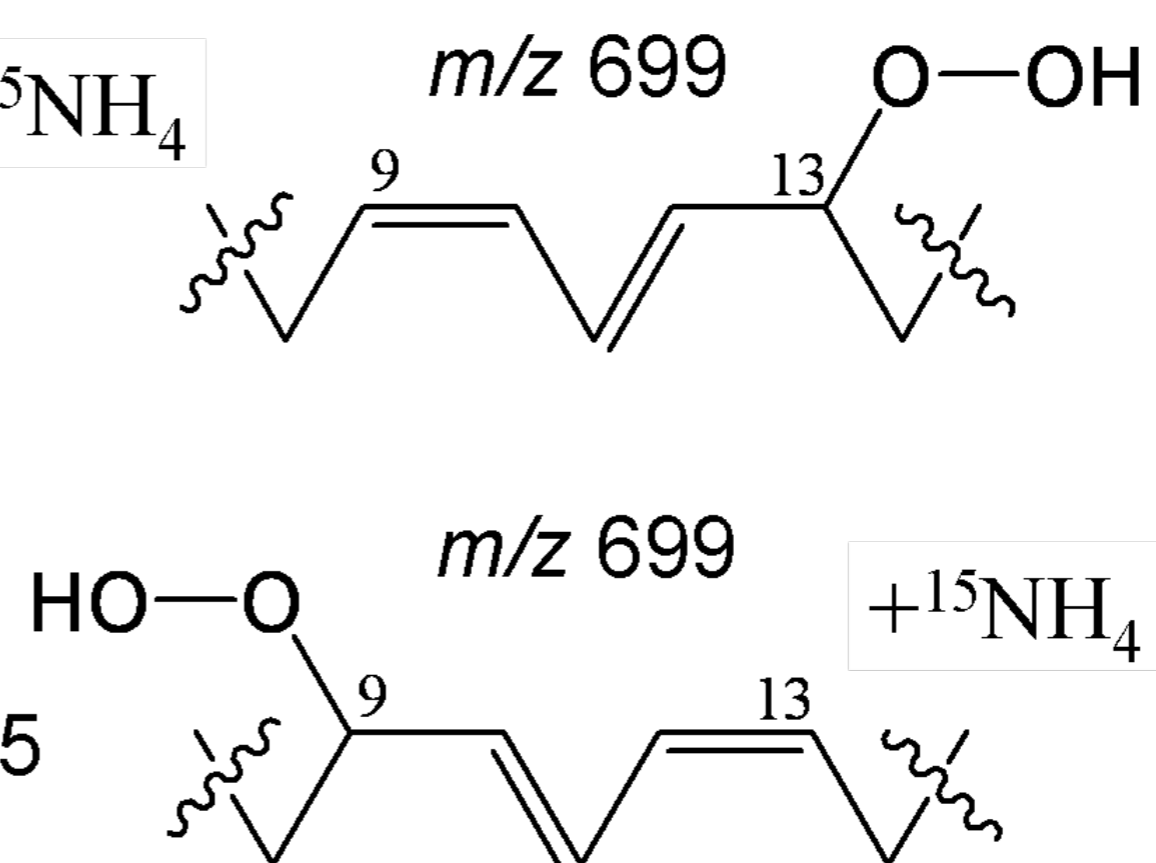

Supplement: NIHMS438328-supplement-Supplementary_Figure_1.pdf [file NIHMS438328-supplement-Supplementary_Figure_1.pdf]

Relative Abundance

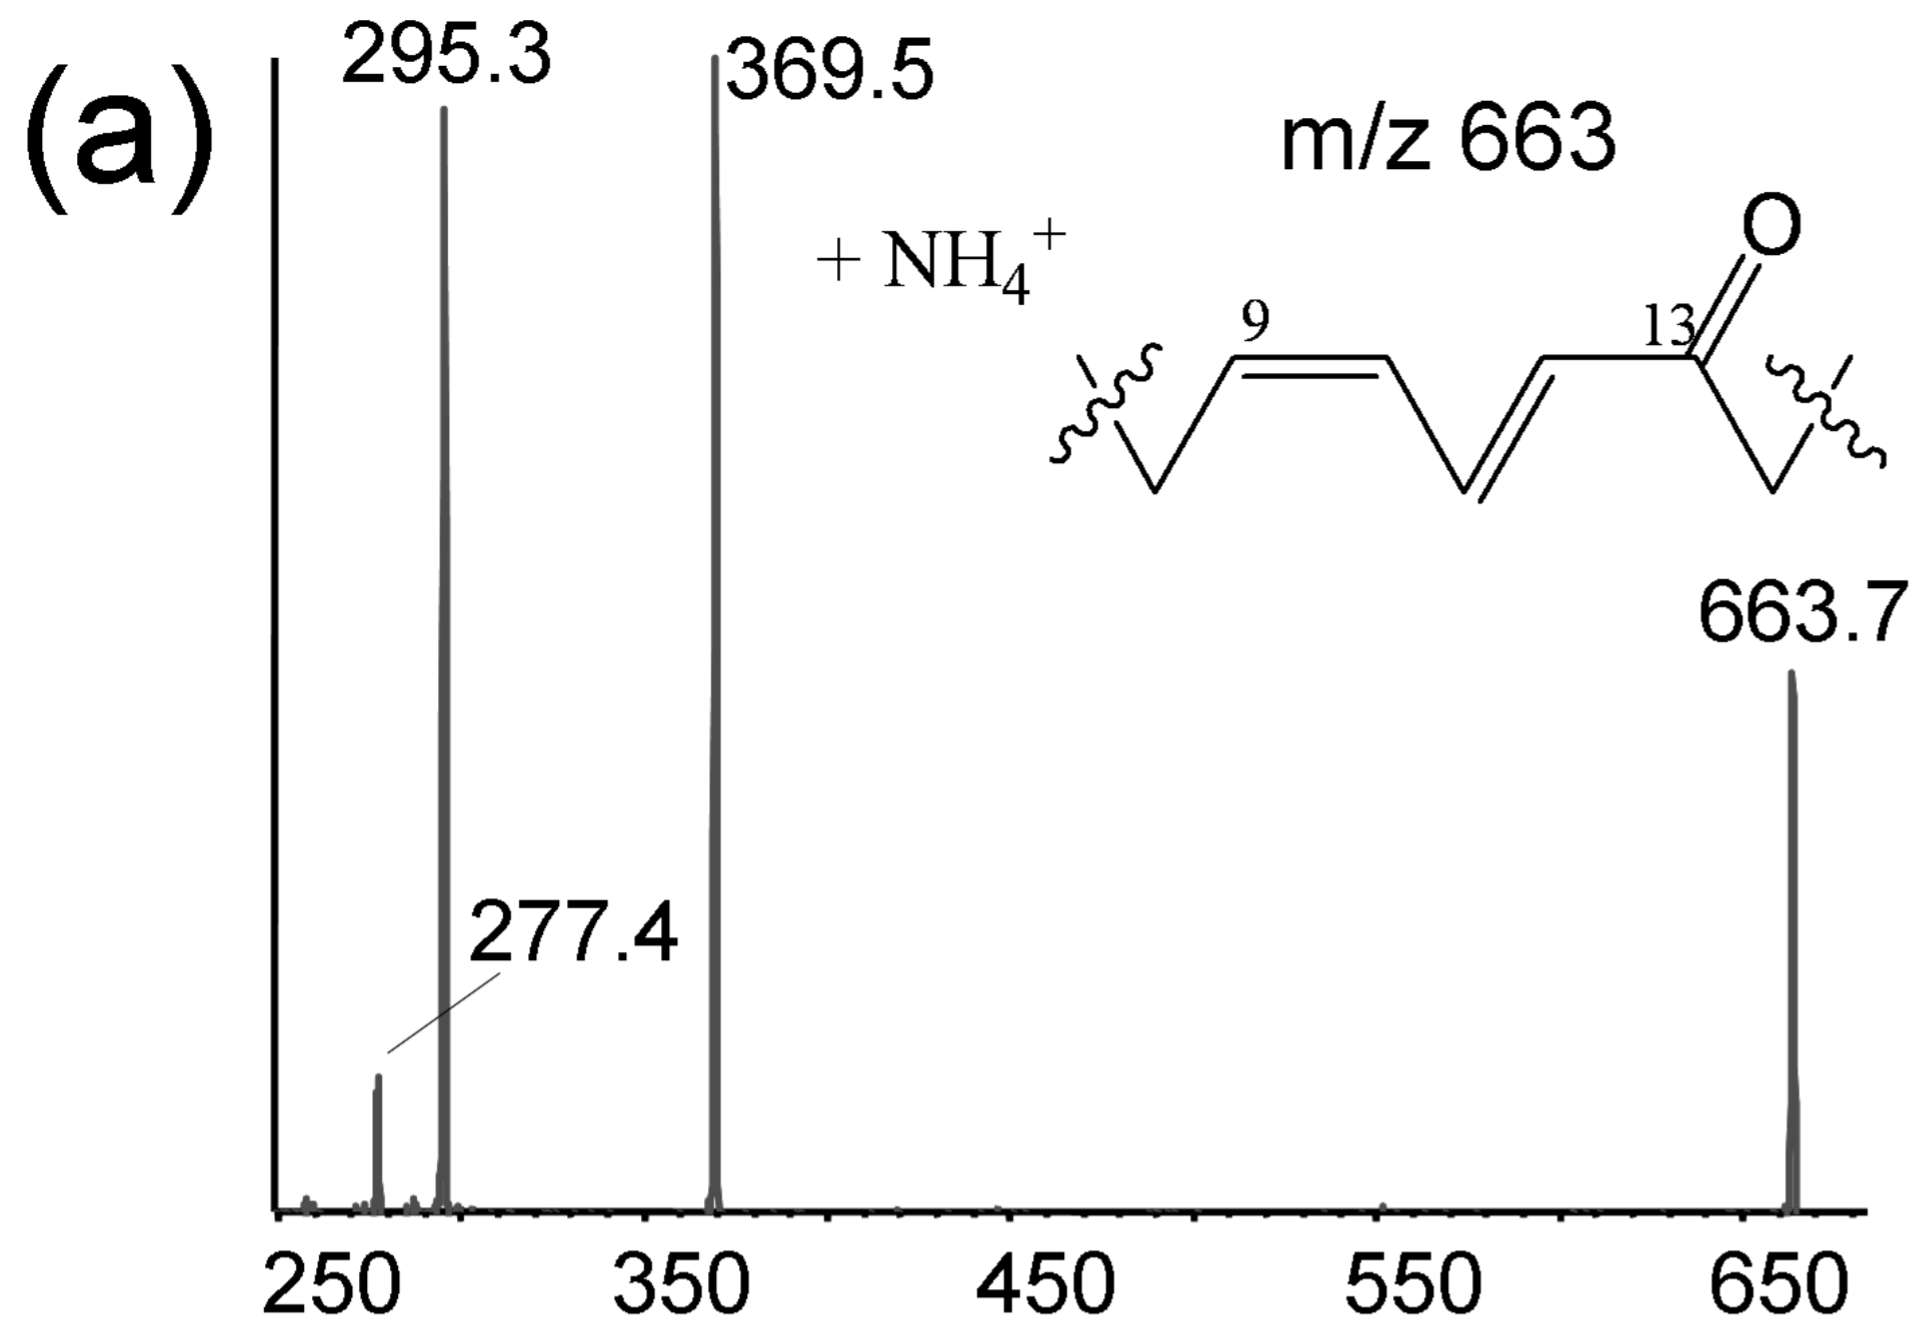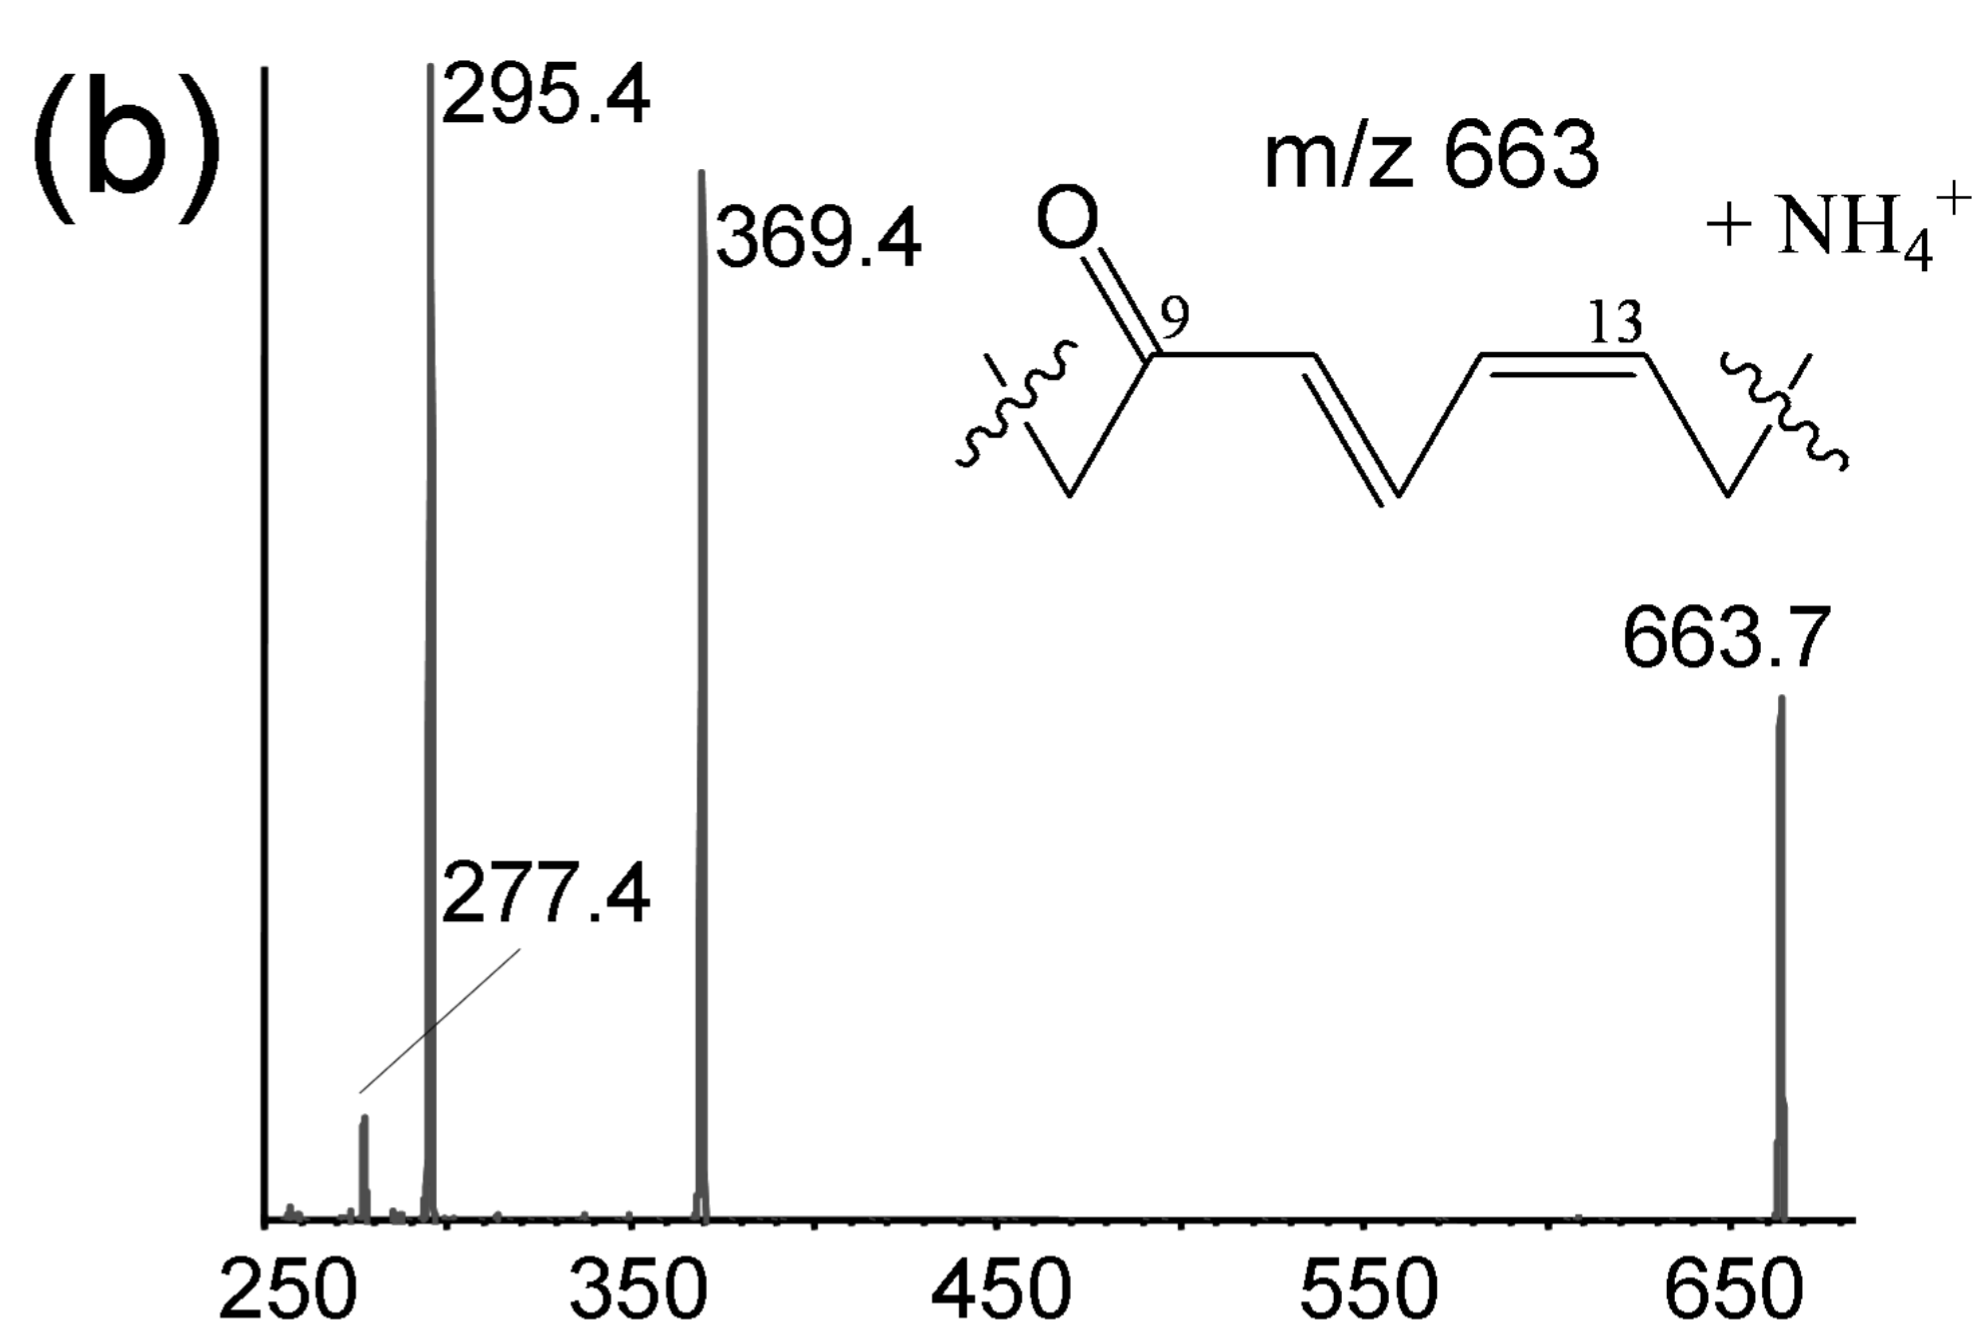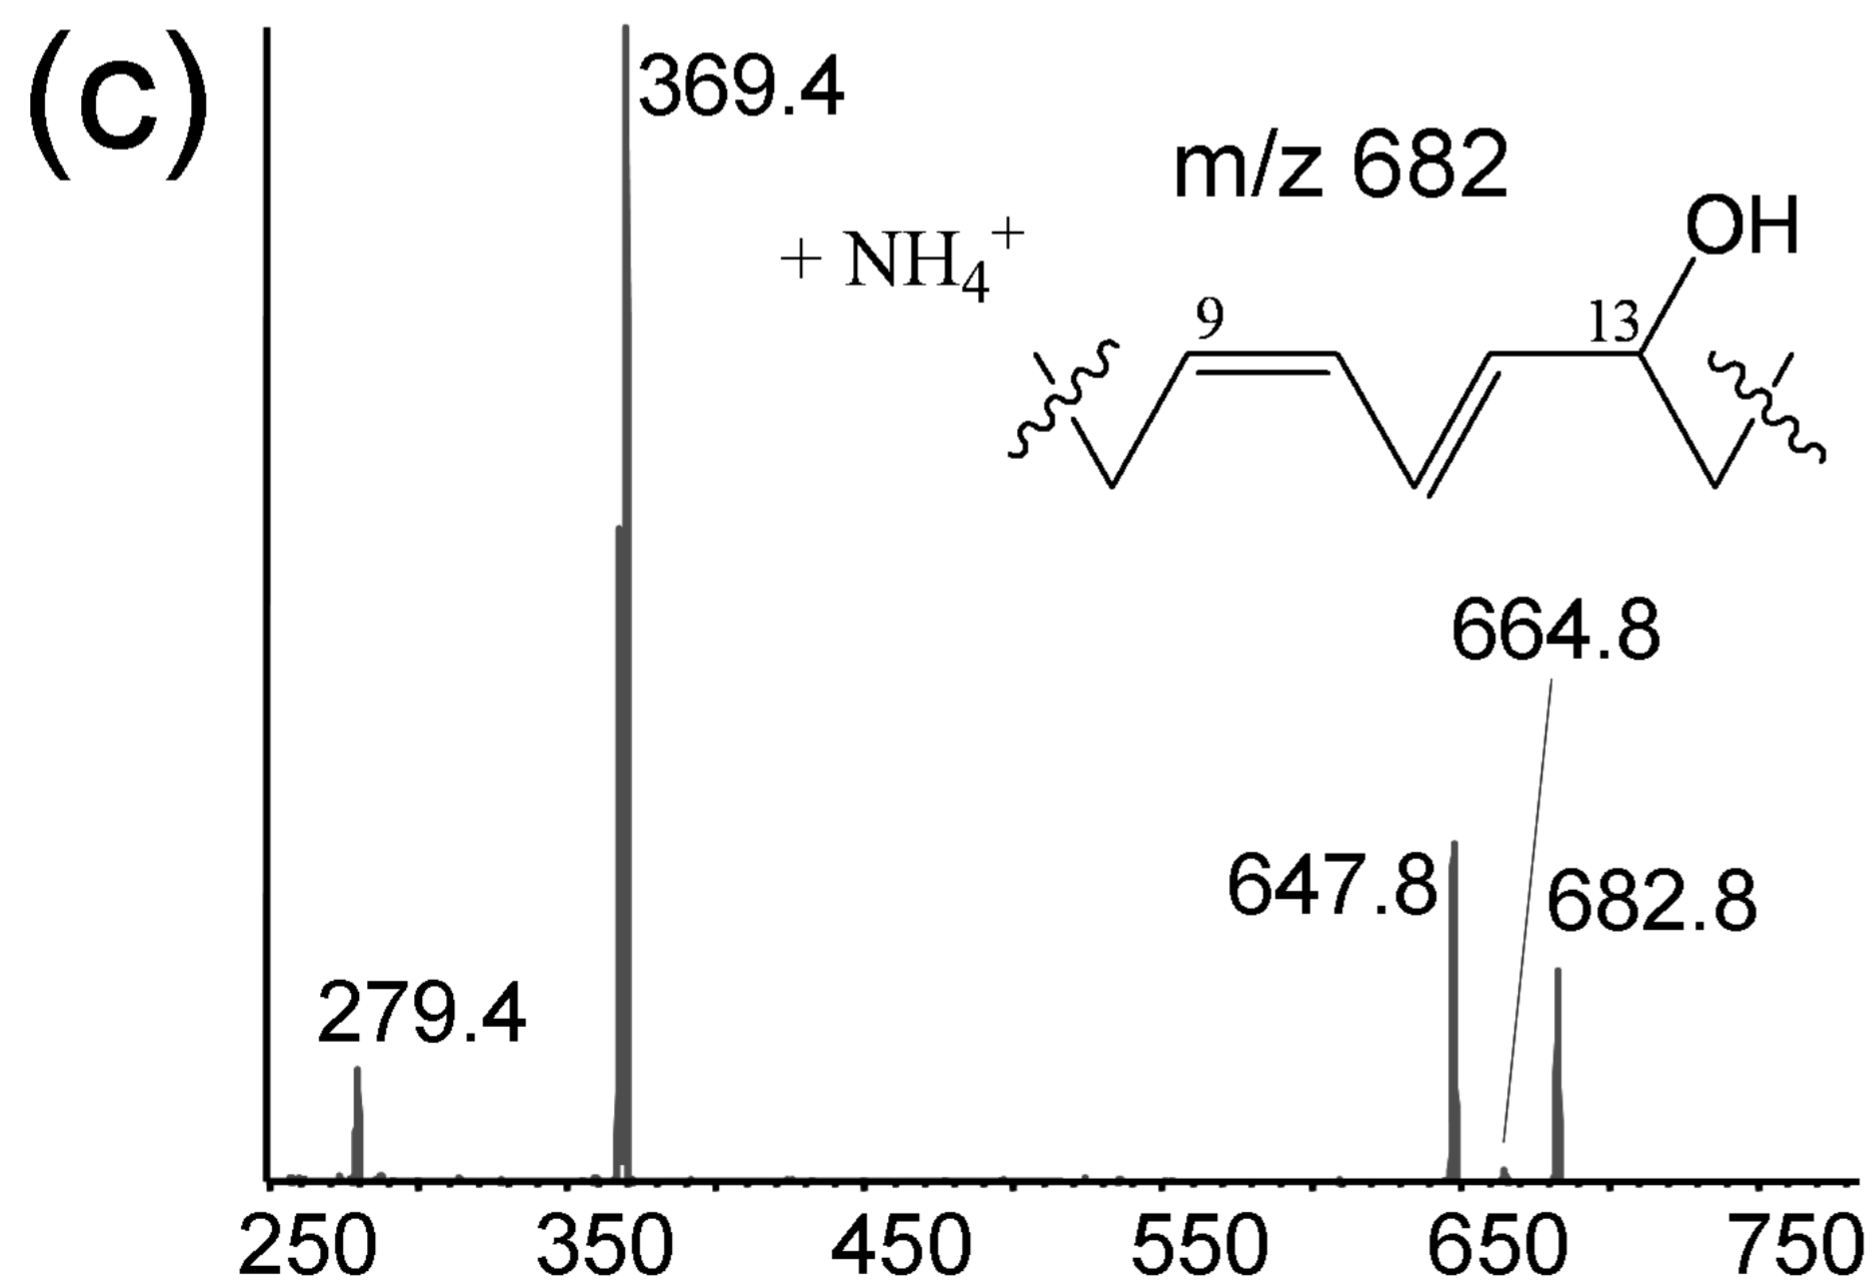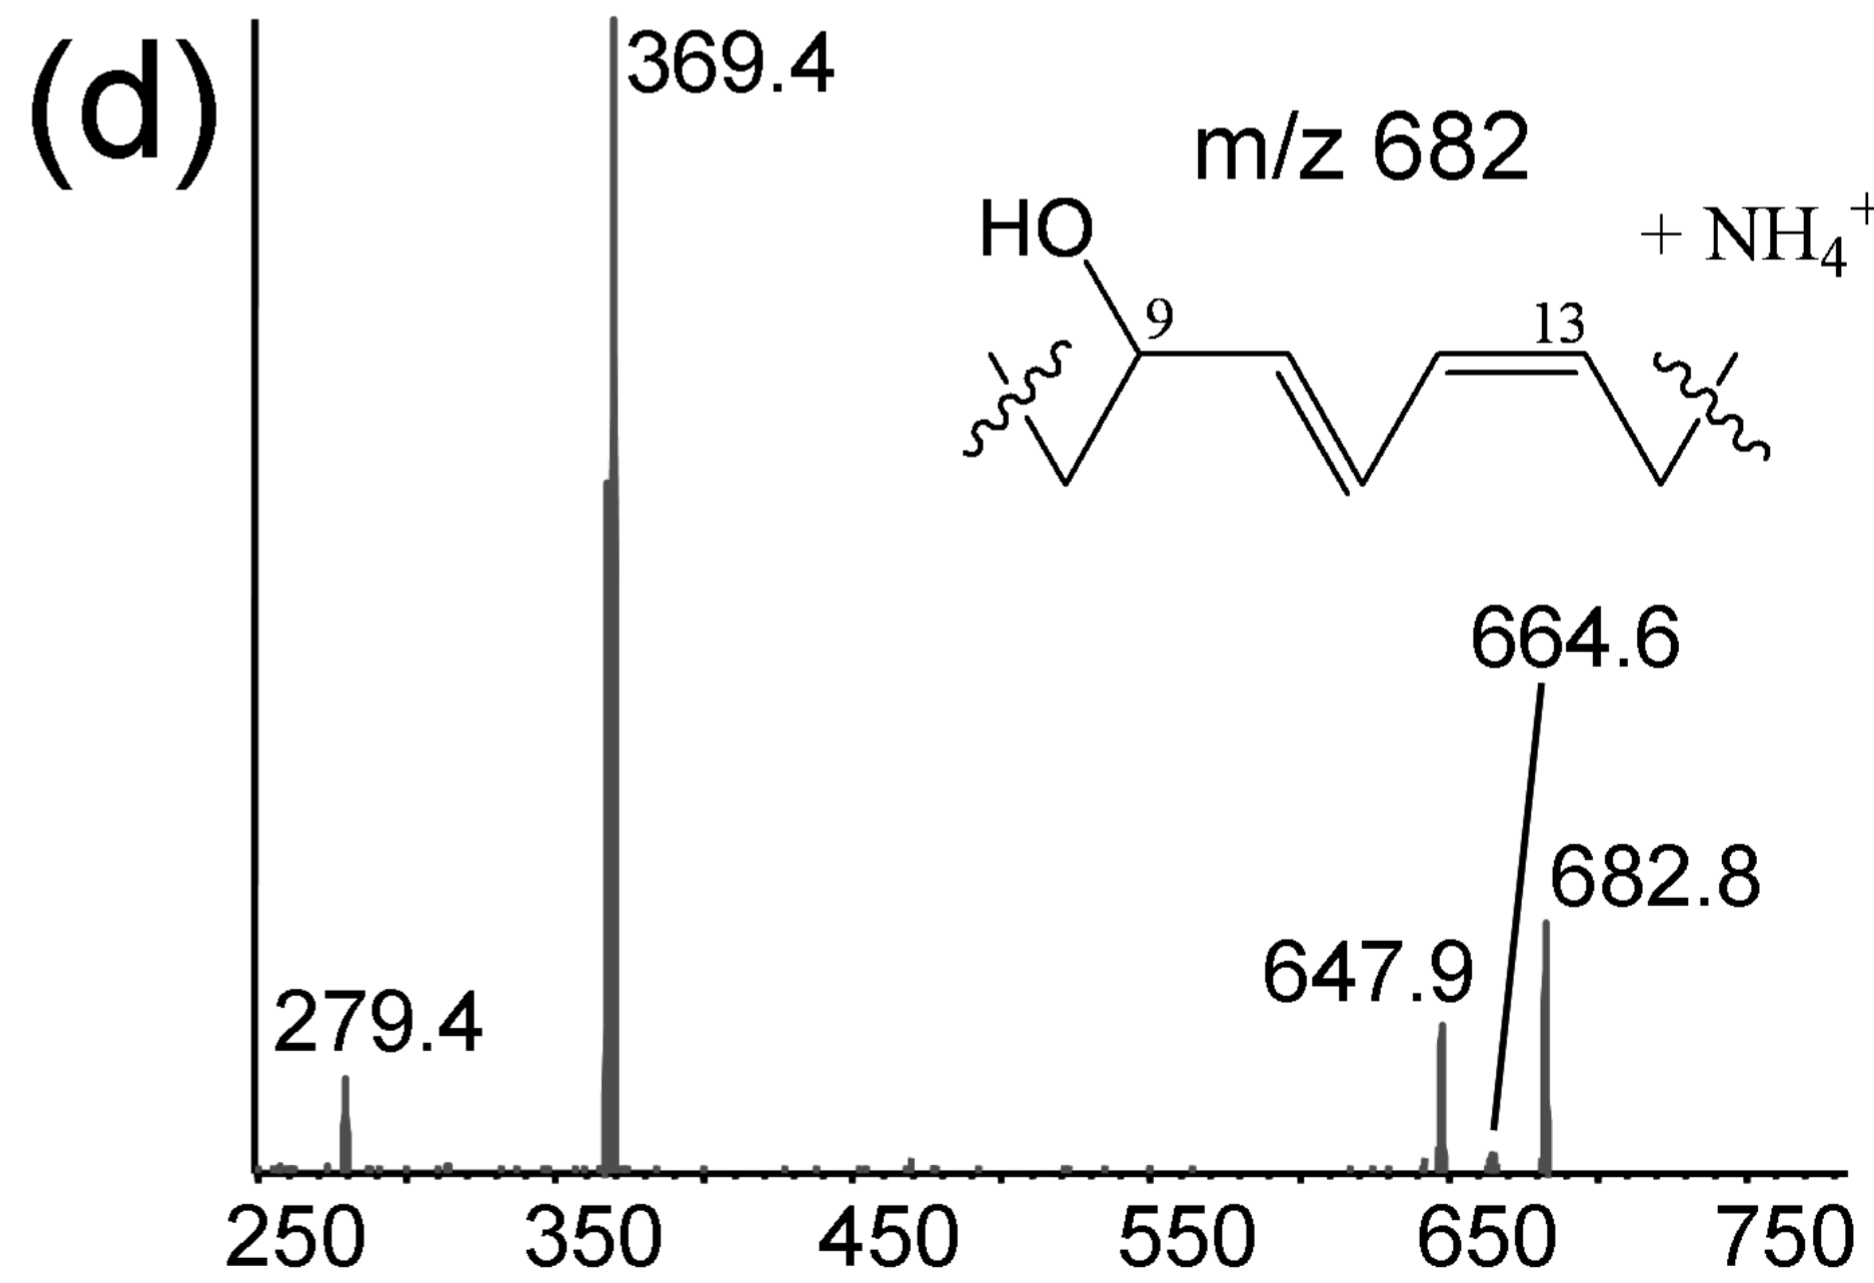

$m/z$

Supplement: NIHMS438328-supplement-Supplementary_Figure_2.pdf [file NIHMS438328-supplement-Supplementary_Figure_2.pdf]
